# Supplementary material
Source: publisher site journal article supplement (https://www.dovepress.com/article/supplementary_file/612052/612052%20Supplementary%20Material.docx)
Supplement: Supplementary file 1 [file 612052%20Supplementary%20Material.docx]

Supplementary information

Table S1. The volume of different solutions used for synthesis of HfO2 NPs

| Sample No. | HfCl4 solution  （mL） | KOH solution  (mL） | DI water (mL) | pH -- 1* | pH -- 2** |
| --- | --- | --- | --- | --- | --- |
| 1 | 6 | 0 | 9 | -- | 0.85 |
| 2 | 6 | 1 | 8 | 0.94 | 1.28 |
| 3 | 6 | 4 | 5 | 1.59 | 1.80 |
| 4 | 6 | 6 | 3 | 3.12 | 3.45 |
| 5 | 6 | 6.1 | 2.9 | 5.03 | 5.88 |
| 6 | 6 | 6.4 | 2.6 | 8.60 | 8.82 |
| 7 | 6 | 7.5 | 1.5 | 11.6 | 10.8 |
| 8 | 6 | 8 | 1 | -- | 11.6 |

*pH--1: the pH value before adding DI water

**pH--2: the pH value after adding DI water


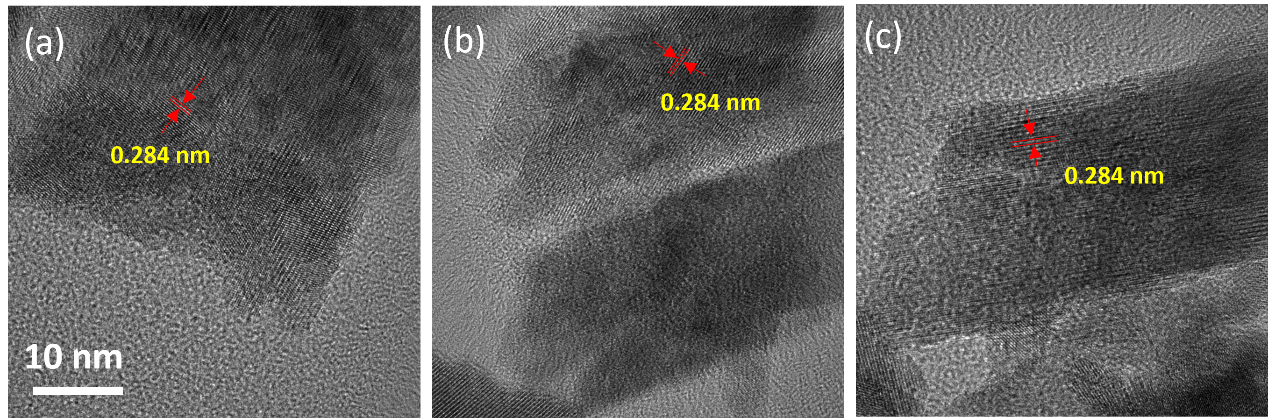


Figure S1. High-resolution TEM of HfO2 samples produced under (a) pH=0.85, 180oC, 8h, (b) pH=3.45, 180oC, 8h and (c) pH=5.88, 180oC, 8h The red arrows indicate the lattice spacing of the obtained samples.


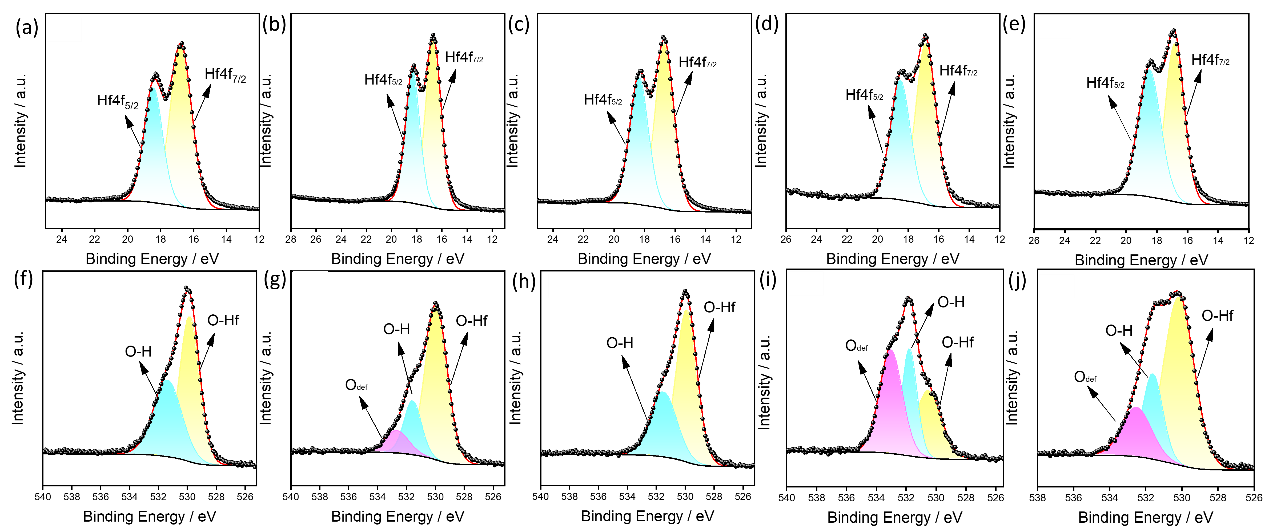


Figure S2. XPS spectra of Hf4f of HfO2 samples prepared under (a) 180oC, 8h, (b) 180oC, 4h, (c) 180oC, 12h, (d) 140oC, 8h, (e) 160oC, 8h; XPS spectra of O1s of HfO2 samples prepared under (f) 180oC, 8h, (g) 180oC, 4h, (h) 180oC, 12h, (i) 140oC, 8h, (j) 160oC, 8h.

Table S2. Quantify analysis of XPS spectra of different HfO2 samples

| Sample | Synthesis Parameter | | | Hf 4f/eV | | O1s/eV | | | |
| --- | --- | --- | --- | --- | --- | --- | --- | --- | --- |
|  | Duration/h | Temperature/oC | Hf 4f 7/2 | | Hf 4f 5/2 | | O-Hf | O-H | O def |
| HfO2 | 8 | 180 | 16.76 | | 18.45 | | 529.88 **(60.7)** | 531.46 **(39.3)** | / |
| HfO2-4h | 4 | 180 | 16.67 | | 18.32 | | 529.93 **(69.6)** | 531.56 **(19.2)** | 532.67 **(11.1)** |
| HfO2-12h | 12 | 180 | 16.68 | | 18.36 | | 529.89 **(64.4)** | 531.49 **(35.6)** | / |
| HfO2-140C | 8 | 140 | 17.18 | | 18.88 | | 530.49 **(30.4)** | 531.76 **(27.9)** | 533.02 **(41.7)** |
| HfO2-160C | 8 | 160 | 16.82 | | 18.48 | | 530.15 **(61.8)** | 531.60 **(20.5)** | 532.49 **(17.6)** |

The bold numbers represent the proportions of oxygen covalent bond types within O1s.


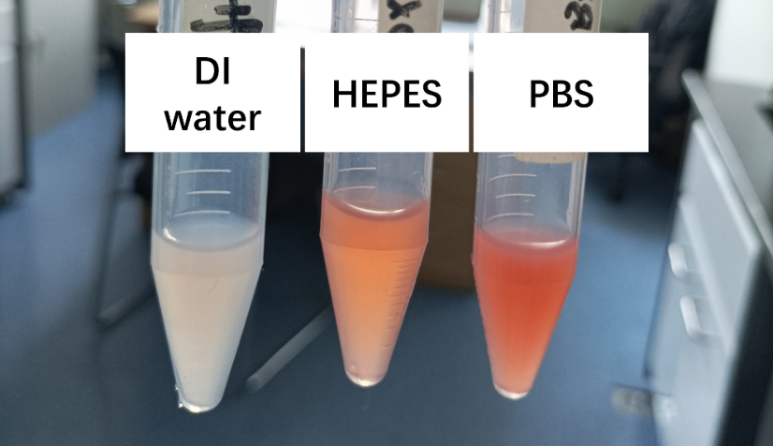


Figure S3. The image of Dox loaded HfO2 NPs synthesized in DI water, HEPES buffer and PBS buffer

Figure S4. Zeta potential of BSA@Hf suspended in different solvent


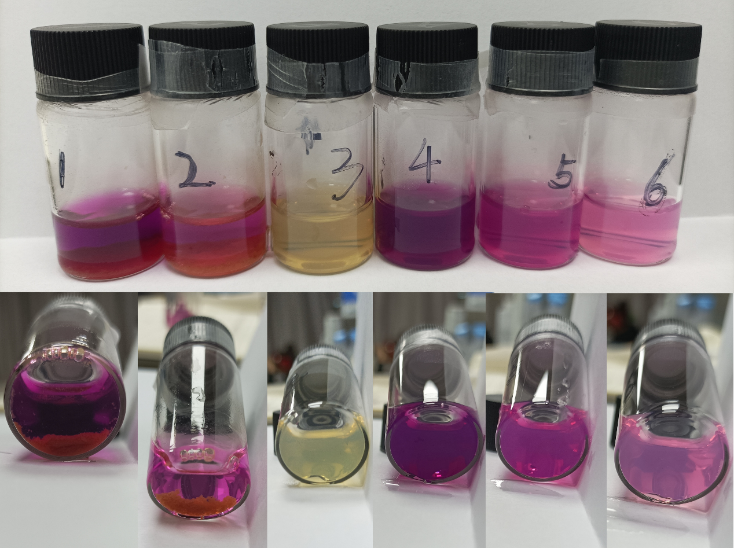


Figure S5. Images of the reaction system of KMnO4 and BSA@Hf NPs as a function of KMnO4 concentrations Sample 1: Cons(KMnO4)=5 mM, Sample 1: Cons(KMnO4)=1.67 mM, Sample 3: Cons(KMnO4)=0. 5 mM; Images of the reaction system of KMnO4 and HfO2 NPs as a function of KMnO4 concentrations Sample 4: Cons(KMnO4)=5 mM, Sample 5: Cons(KMnO4)=1.67 mM, Sample 6: Cons(KMnO4)=0. 5 mM


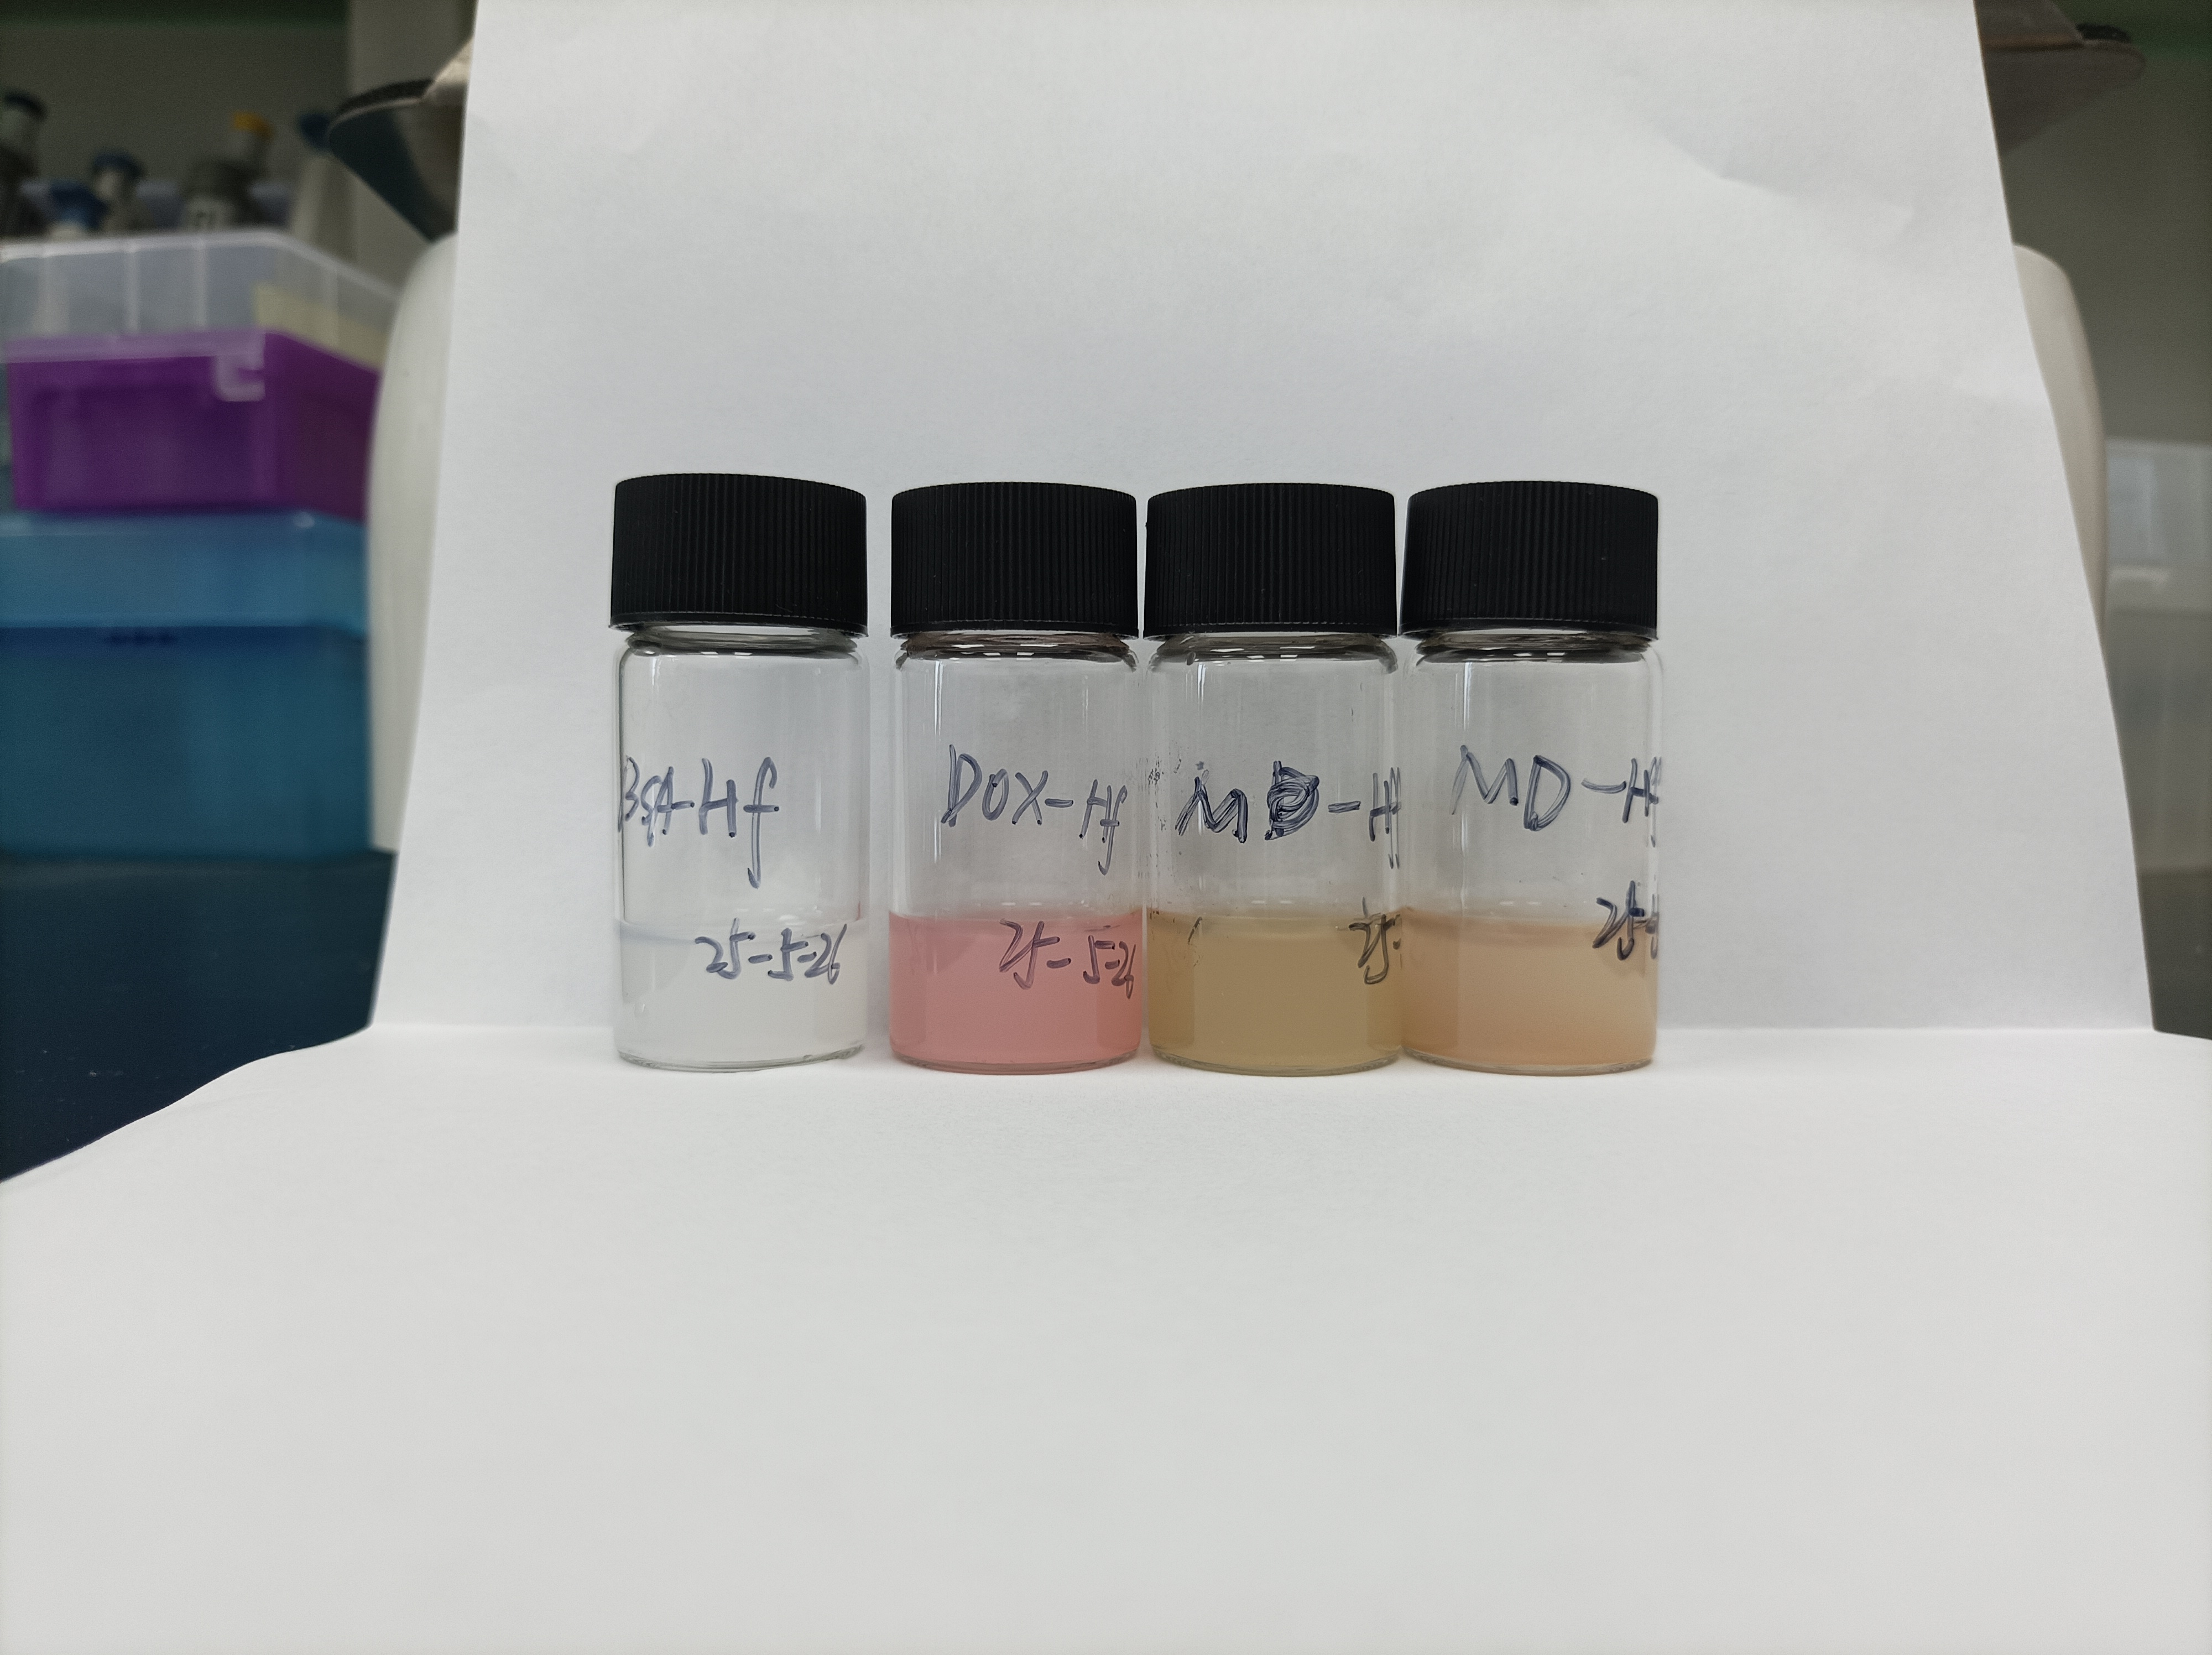


Figure S6. Images of the samples: BSA@Hf, D-Hf, M-Hf, MD-Hf (left to right)


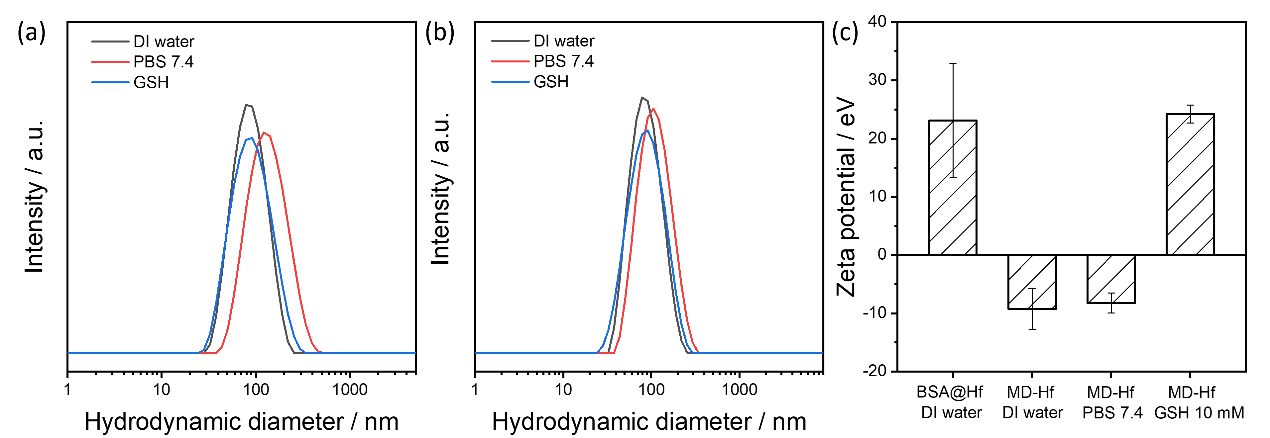


Figure S7. Size distribution of MD-Hf in different solvent at (a) 0 hour and (b) 5 hour; (c) Zeta potential of different Hf based NPs in different solvents at 5 hour. (The MD-Hf solvent is mixed with different solvent by the volume ratio of 1:1)


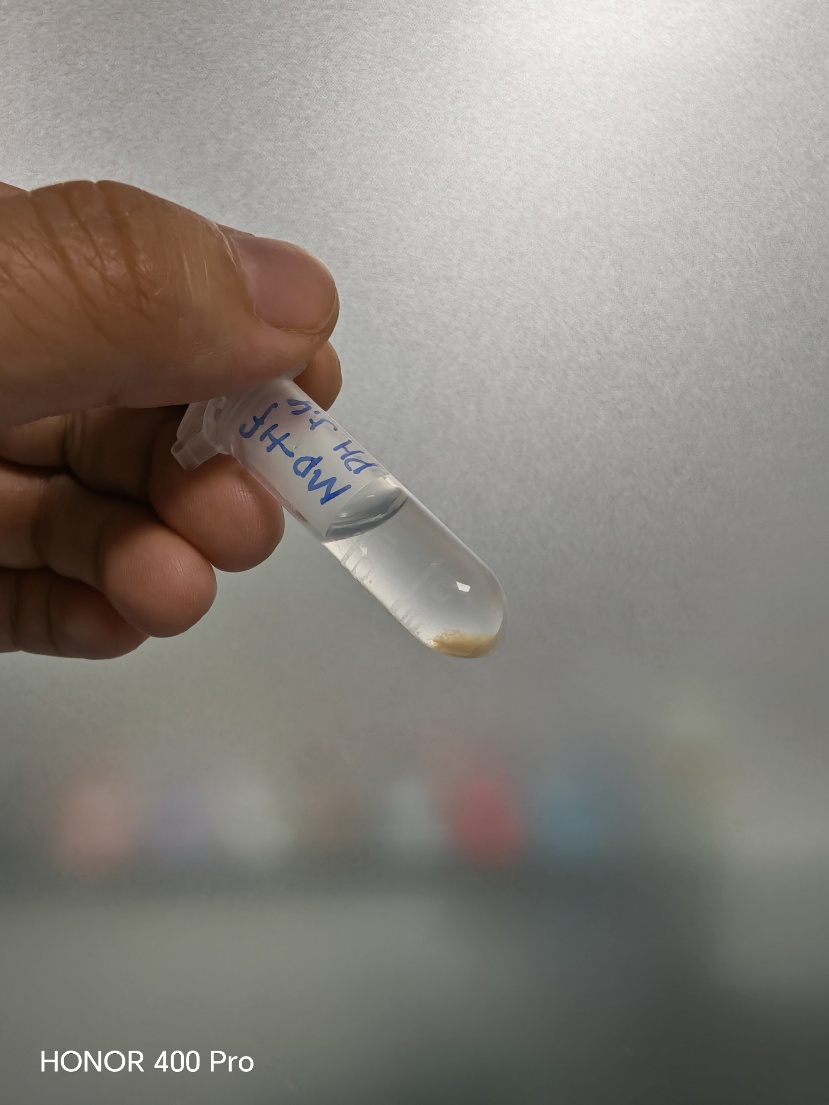


Figure S8 Image of MD-Hf mixed with PBS (pH=5.4)


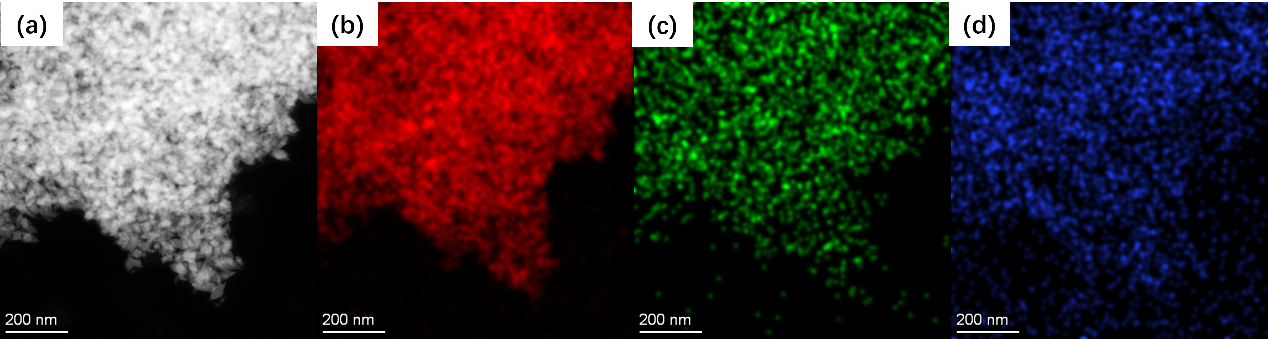


Figure S9. TEM-EDS mapping of DM-Hf sample: (a) HADDF, (b) Hf distribution, (c) Mn distribution and (d) C distribution.

Figure S10 GSH concentration in cells with different treatments.


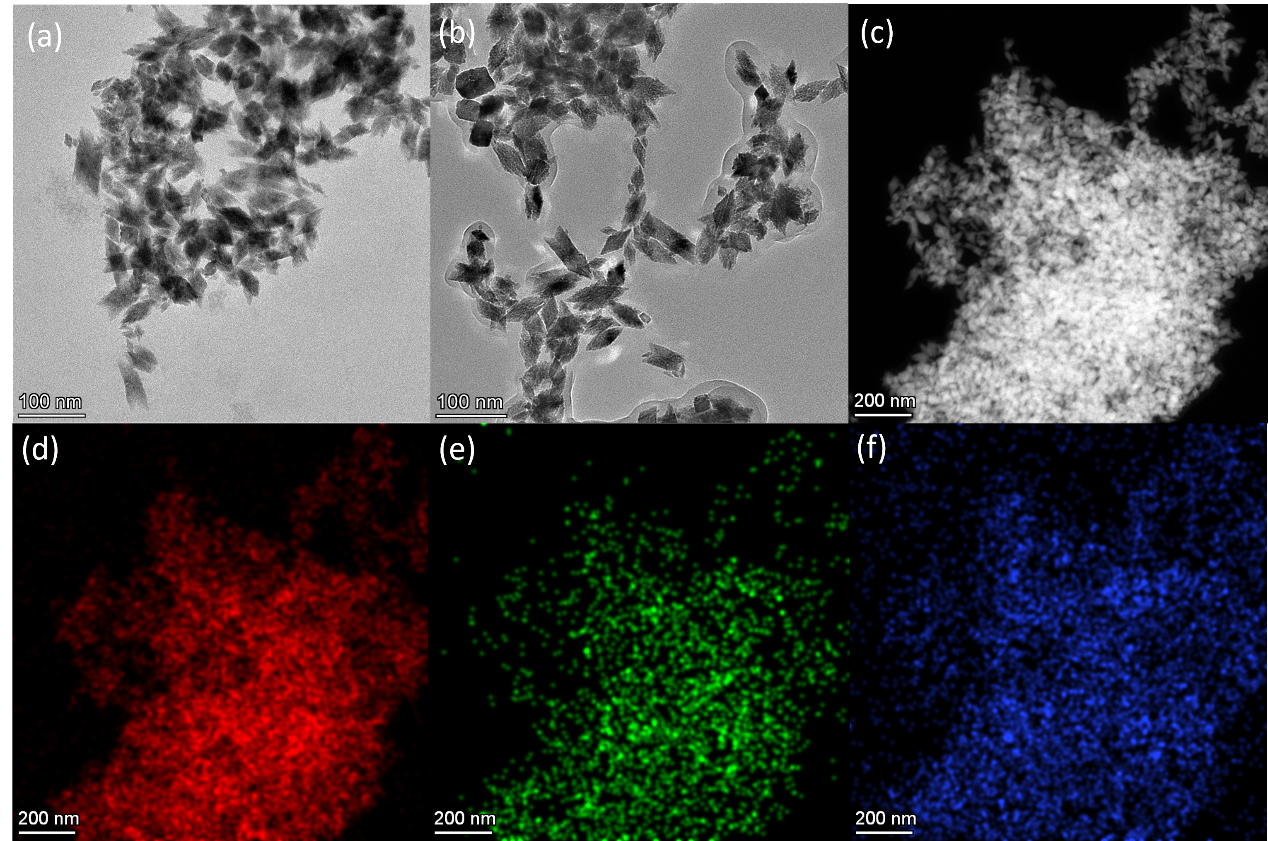


Figure S11. TEM image of DM-Hf sample (a)before and (b) after incubation with 10 mM GSH; TEM-EDS mapping of MD-Hf sample interact with GSH for 30 min: (c) HADDF, (d) Hf distribution, (e) Mn distribution and (f) C distribution.

Table S3. Element composition of samples according to the qualitative analysis of TEM-EDS

| Sample | Hf  Mass ratio / % | C  Mass ratio / % | Mn  Mass ratio / % |
| --- | --- | --- | --- |
| DM-Hf (-GSH) | 92.01 | 7.44 | 0.55 |
| DM-Hf (+GSH) | 92.77 | 6.8 | 0.43 |


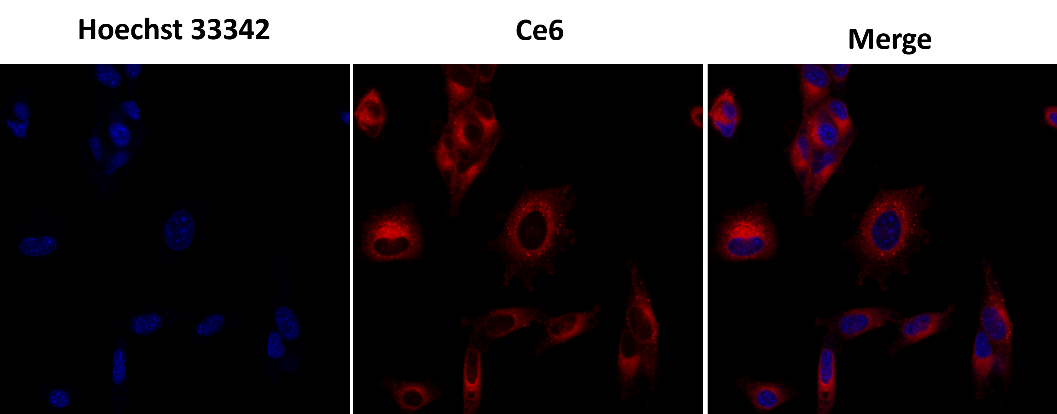


Figure S12. CLSM images of the Hep 1-6 cells after administrated Ce6 labled BSA@Hf for 24 hours.


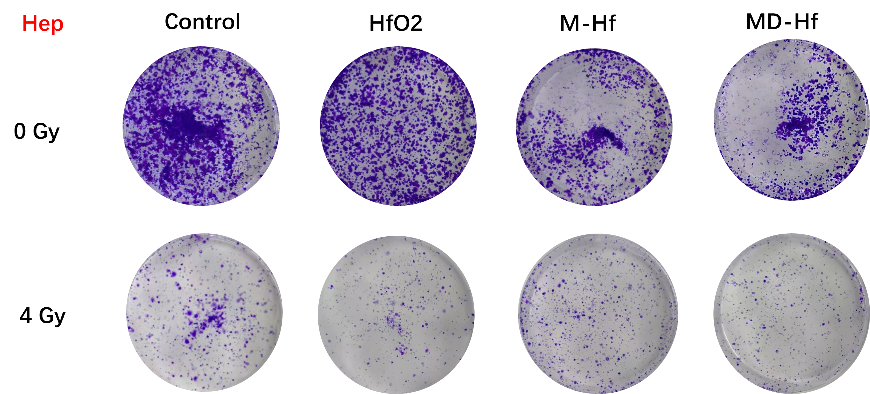


Figure S13. the colony formation of Hep 1-6 cell line after different treatment.


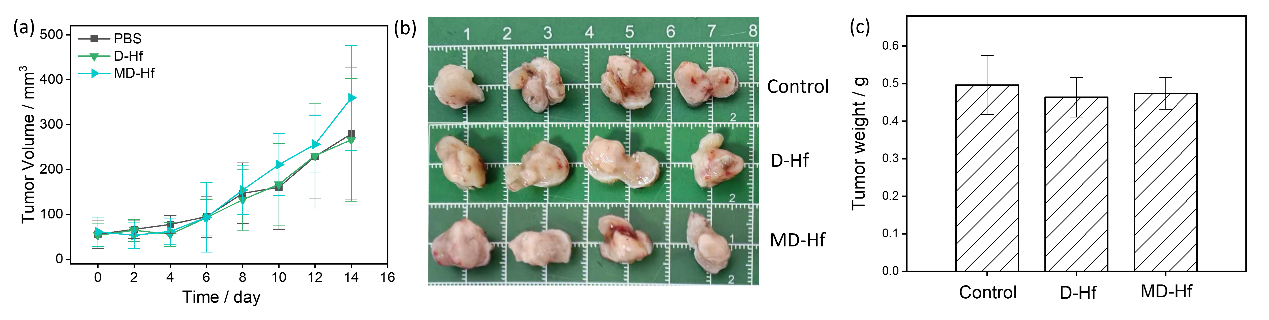


Figure S14. The time-dependent curves of the (a)tumor volume, (b) pictures of tumor excised from each group and (c) the histogram of tumor weight（n=4）of different treatment groups.


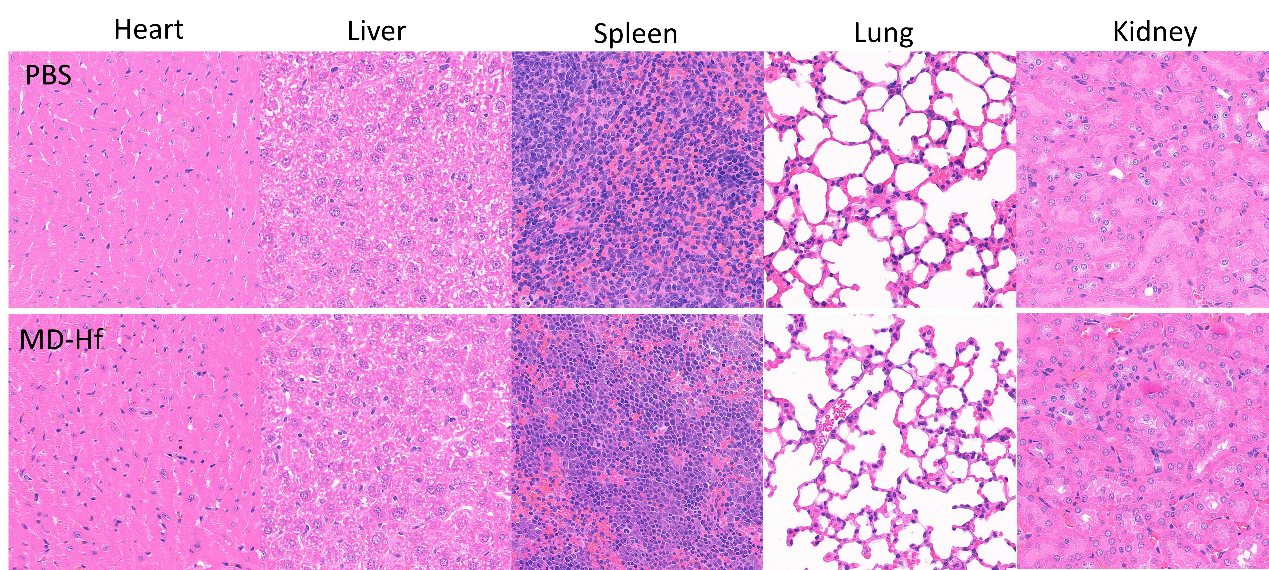


Figure S15. Representative H&E-stained sections of major organs from mice after different treatments (Up: organs from PBS treated group; down: organs from MD-Hf treated group).


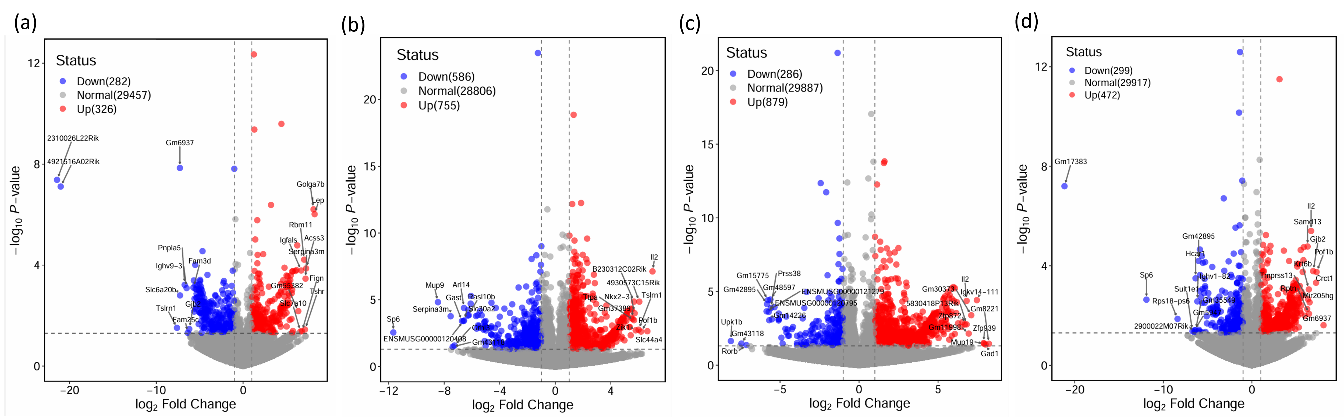


Figure S16. Volcano plots of differentially expressed genes (DEGs) under different treatment (a) HfO2 vs RT(only X-ray), (b) D-Hf vs HfO2, (c) M-Hf vs HfO2 and (d) MD-Hf vs HfO2.(n=3)
